# Supplementary material for: Clinical Implications of the Autophagy Core Gene Variations in Advanced Lung Adenocarcinoma Treated with Gefitinib
Source: PubMed Central journal article supplement (PMC5736620; doi:10.1038/s41598-017-18165-5), 2017-12-19

## **Clinical Implications of the Autophagy Core Gene Variations in Advanced Lung Adenocarcinoma Treated with Gefitinib**

Jupeng Yuan<sup>1,†</sup>; Nasha Zhang<sup>1,2,†</sup>; Longbin Yin<sup>3,†</sup>; Hui Zhu<sup>2</sup>; Li Zhang<sup>3</sup>; Liqing Zhou<sup>4</sup>; Ming Yang<sup>1,\*</sup>

**Authors' affiliations:** <sup>1</sup>Shandong Provincial Key Laboratory of Radiation Oncology, Cancer Research Center, Shandong Cancer Hospital affiliated to Shandong University, Shandong Academy of Medical Sciences, Jinan, Shandong Province, China; <sup>2</sup>Department of Radiation Oncology, Shandong Cancer Hospital affiliated to Shandong University, Shandong Academy of Medical Sciences, Jinan, Shandong Province, China; <sup>3</sup>Department of Oncology, Tongji Hospital, Tongji Medical College, Huazhong University of Science and Technology, Wuhan, Hubei Province, China; <sup>4</sup>Department of Radiation Oncology, Huaian No. 2 Hospital, Huaian, Jiangsu Province, China.

**†Note:** Jupeng Yuan, Nasha Zhang and Longbin Yin contributed equally to this work.

**\*Correspondence to:** Ming Yang, Professor, Shandong Provincial Key Laboratory of Radiation Oncology, Cancer Research Center, Shandong Cancer Hospital affiliated to Shandong University, Shandong Academy of Medical Sciences, Jinan 250117, Shandong Province, China. Tel & Fax: 86531-67626536; E-mail: aaryoung@yeah.net, yangm@sdu.edu.cn.

**Short title:** ATG5 and ATG10 in EGFR-TKI therapy

**Keywords:** EGFR-TKI; gefitinib; autophagy; genetic polymorphism; survival; drug resistance

**Manuscript category:** Research Article

**Conflict of Interest:** None to declare

**Funding:** This study was partially supported by National Natural Science Foundation of China (31671300, 81572934); Taishan Scholars Program of Shandong Province (tsqn20161060); the National High-Tech Research and Development Program of China (2015AA020950); the Science and Technology Planning Project of Huaian (HAS2015013); Foundation of Shandong Academy of Medical Sciences (2015-44); Medicine and Health Science Technology Foundation (2015WSA18054).

**Supplementary Table 1. Clinical characteristics of advanced lung adenocarcinoma patients treated with gefitinib**

| <b>Characteristics</b>   | <b><i>n</i> (%)</b> |
|--------------------------|---------------------|
|                          | 108                 |
| Age of onset (year)      |                     |
| Average                  | 56                  |
| Range                    | 46-66               |
| Gender                   |                     |
| Male                     | 53(49.07)           |
| Female                   | 55(50.93)           |
| Treatment with gefitinib |                     |
| Yes                      | 108(100.00)         |
| No                       | 0(0.00)             |
| ECOG                     |                     |
| 0-1                      | 86(79.63)           |
| ≥ 2                      | 22(20.37)           |
| Smoke                    |                     |
| Yes                      | 32(29.63)           |
| No                       | 76(70.37)           |
| <i>EGFR</i> status       |                     |
| WT                       | 27(25.00)           |
| Mutant                   | 81(75.00)           |
| EGFR mutation            |                     |
| Del 19                   | 34(31.48)           |
| L858R                    | 37(34.26)           |
| Others                   | 10(9.26)            |
| Histological grade (TNM) |                     |
| IIIB                     | 25(23.15)           |
| IV                       | 83(76.85)           |
| Treatment effects        |                     |
| CR                       | 9(8.33)             |
| PR                       | 28(25.93)           |
| SD                       | 34(31.48)           |
| PD                       | 37(34.26)           |

Note: EGFR, epidermal growth factor receptor; TNM, tumor node metastasis; CR, complete response; PR, partial response; SD, stable disease; PD, progressive disease.

**Supplementary Table 2.** Oligonucleotides used in this study

| #              | Direction | Sequence                        |
|----------------|-----------|---------------------------------|
| qRT-PCR        |           |                                 |
| <i>OCT4</i>    | Forward   | GGTTCTATTTGGGAAGGTATTCAG        |
|                | Reverse   | TGGTTCGCTTTCTCTTTTCGG           |
| <i>MTF1</i>    | Forward   | GCAGCAAATACTTCACCACAC           |
|                | Reverse   | GAGTGATTTGTATCCTCTGATCC         |
| <i>SOX5</i>    | Forward   | CTGGATGTAGTGACCCTTACC           |
|                | Reverse   | CTGTTTGTGCTCTTGTCTGTG           |
| <i>ATG5</i>    | Forward   | GTTGCTTACTAAGTTTGGCTTTGG        |
|                | Reverse   | GGTGTGCCTTCATATTCAAACC          |
| <i>ATG10</i>   | Forward   | TATTACGCAACAGGAACATCCA          |
|                | Reverse   | GAGTCCGCTTTAAGGTTGTC            |
| <i>β-actin</i> | Forward   | GGCGGCACCACCATGTACCCT           |
|                | Reverse   | AGGGGCCGGACTCGTCATACT           |
| EMSA           |           |                                 |
| rs10036653-A   | Forward   | GTTTTTGGCATGTGAATTATGAAACTTTAAA |
|                | Reverse   | TTTAAAGTTTCATAATTCACATGCCAAAAAC |
| rs10036653-T   | Forward   | GTTTTTGGCATGTGATTTATGAAACTTTAAA |
|                | Reverse   | TTTAAAGTTTCATAAATCACATGCCAAAAAC |
| siRNA duplexes |           |                                 |
| siSOX5-1       | Sense     | GCCAUUUUAUGAGGAGCAATT           |
|                | Antisense | UUGCUCUCAUAAUAUGGCTT            |
| siSOX5-2       | Sense     | CCUGUUAUCCAGAGCACUUTT           |
|                | Antisense | AAGUGCUCUGGAUAACAGGTT           |
| siMTF1-1       | Sense     | CCAGCAAUCAUCUUUGAAUTT           |
|                | Antisense | AUUCAAAGAUGAUUGCUGGTT           |
| siMTF1-2       | Sense     | GCACACAGUUUGCUGCUAATT           |
|                | Antisense | UUAGCAGCAAACUGUGUGCTT           |
| siOCT4-1       | Sense     | GAGGCAACCUUGGAGAAUUUTT          |
|                | Antisense | AAAUUCUCCAGGUUGCCUCTT           |
| siOCT4-2       | Sense     | GCUCUCCCAUGCAUUCAATT            |
|                | Antisense | UUUGAAUGCAUGGGAGAGCTT           |

**Supplementary Table 3. Autophagy core gene SNPs analyzed in this study**

| No | Genes          | SNPs        | Variant type                      | Alleles | Location       |
|----|----------------|-------------|-----------------------------------|---------|----------------|
| 1  | <i>ATG2B</i>   | rs3759601   | Missense variant                  | G/C     | Chr14:96311131 |
| 2  | <i>ATG2B</i>   | rs9323945   | Missense variant                  | T/C     | Chr14:96315575 |
| 3  | <i>ATG3</i>    | rs7652377   | Intron variant                    | A/C     | Chr3:112564045 |
| 4  | <i>ATG4C</i>   | rs10493327  | Intron variant                    | C/T     | Chr1:62838174  |
| 5  | <i>ATG5</i>    | rs2245214   | Intron variant                    | C/G     | Chr6:106214866 |
| 6  | <i>ATG5</i>    | rs3804338   | Intron variant                    | C/T     | Chr6:106324898 |
| 7  | <i>ATG5</i>    | rs510432    | Upstream gene variant             | T/C     | Chr6:106326155 |
| 8  | <i>ATG5</i>    | rs688810    | Upstream gene variant             | A/G     | Chr6:106328206 |
| 9  | <i>ATG7</i>    | rs1375206   | Intron variant                    | C/G     | Chr3:11297643  |
| 10 | <i>ATG7</i>    | rs1470612   | Intron variant                    | C/T     | Chr3:11295492  |
| 11 | <i>ATG7</i>    | rs8154      | Synonymous variant                | T/C     | Chr3:11554828  |
| 12 | <i>ATG9B</i>   | rs61733329  | Missense variant                  | C/T     | Chr7:151017080 |
| 13 | <i>ATG10</i>   | rs10036653  | Upstream gene variant             | A/T     | Chr5:81970563  |
| 14 | <i>ATG10</i>   | rs10514231  | Intron variant                    | C/T     | Chr5:82011593  |
| 15 | <i>ATG10</i>   | rs1864182   | Missense variant                  | C/A     | Chr5:82253421  |
| 16 | <i>ATG10</i>   | rs1864183   | Missense variant                  | C/T     | Chr5:82253397  |
| 17 | <i>ATG10</i>   | rs3734114   | Missense variant                  | T/C     | Chr5:82058570  |
| 18 | <i>ATG12</i>   | rs26532     | Noncoding transcript exon variant | C/A     | Chr5:115837981 |
| 19 | <i>ATG12</i>   | rs26534     | Intron variant                    | G/A     | Chr5:115840004 |
| 20 | <i>ATG12</i>   | rs26538     | Intron variant                    | C/T     | Chr5:115842698 |
| 21 | <i>ATG16L1</i> | rs2241880   | Missense variant                  | A/G     | Chr2:233274722 |
| 22 | <i>ATG16L2</i> | rs11235604  | Missense variant                  | C/T     | Chr11:72822491 |
| 23 | <i>BECN</i>    | rs9890617*  | Noncoding transcript exon variant | C/T     | Chr17:42820651 |
| 24 | <i>BECN</i>    | rs9891429*  | Noncoding transcript exon variant | T/C     | Chr17:42820407 |
| 25 | <i>BECN</i>    | rs10512488* | Noncoding transcript exon variant | G/A     | Chr17:42811886 |
| 26 | <i>BECN</i>    | rs11552192  | 3' UTR variant                    | A/T     | Chr17:42810491 |

Note: SNP, single nucleotide polymorphism; Chr, Chromosome.

\**BECN* rs9890617, rs9891429 and rs10512488 were excluded for the following analyses because of genotyping failure.

**Supplementary Table 4. Associations of genetic variants of autophagy core genes with OS and PFS**

| Genes        | SNPs       | Genotypes | Patients<br>No. (%) | OS of all patients |       | PFS of all patients |       |
|--------------|------------|-----------|---------------------|--------------------|-------|---------------------|-------|
|              |            |           |                     | HR (95% CI)        | P     | HR (95% CI)         | P     |
|              |            |           |                     | 107                |       |                     |       |
| <i>ATG2B</i> | rs3759601  | CC        | 45(42.06)           | Reference          |       | Reference           |       |
|              |            | CG        | 8(7.48)             | 1.09 (0.71-1.67)   | 0.705 | 1.08 (0.69-1.68)    | 0.742 |
|              |            | GG        | 54(50.47)           | 1.69 (0.73-3.88)   | 0.218 | 1.84 (0.75-4.52)    | 0.181 |
|              |            | CG+GG     | 62(57.94)           | 1.13 (0.75-1.70)   | 0.561 | 1.13 (0.74-1.73)    | 0.580 |
|              |            |           |                     | 108                |       |                     |       |
| <i>ATG2B</i> | rs9323945  | CC        | 65(60.19)           | Reference          |       | Reference           |       |
|              |            | CT        | 38(35.19)           | 0.75 (0.46-1.21)   | 0.239 | 0.71 (0.43-1.16)    | 0.170 |
|              |            | TT        | 5(4.63)             | 0.66 (0.25-1.71)   | 0.393 | 0.47 (0.16-1.35)    | 0.161 |
|              |            | CT+TT     | 43(39.81)           | 0.74 (0.47-1.16)   | 0.186 | 0.69 (0.43-1.09)    | 0.111 |
|              |            |           |                     | 107                |       |                     |       |
| <i>ATG3</i>  | rs7652377  | CC        | 54(50.47)           | Reference          |       | Reference           |       |
|              |            | CA        | 46(42.99)           | 0.84 (0.54-1.29)   | 0.416 | 0.88 (0.56-1.38)    | 0.580 |
|              |            | AA        | 7(6.54)             | 0.50 (0.21-1.22)   | 0.129 | 0.45 (0.17-1.19)    | 0.107 |
|              |            | CA+AA     | 53(49.53)           | 0.78 (0.51-1.18)   | 0.234 | 0.81 (0.63-1.25)    | 0.337 |
|              |            |           |                     | 104                |       |                     |       |
| <i>ATG4C</i> | rs10493327 | AA        | 53(50.96)           | Reference          |       | Reference           |       |
|              |            | AG        | 35(33.65)           | 1.21 (1.21-0.73)   | 0.466 | 1.37 (0.79-2.37)    | 0.263 |
|              |            | GG        | 17(16.35)           | 0.91 (0.49-1.66)   | 0.748 | 1.18 (0.61-2.27)    | 0.621 |
|              |            | AG+GG     | 52(50.00)           | 1.01 (0.66-1.78)   | 0.971 | 1.25 (0.77-2.02)    | 0.365 |
|              |            |           |                     | 106                |       |                     |       |
| <i>ATG5</i>  | rs2245214  | GG        | 33(31.13)           | Reference          |       | Reference           |       |
|              |            | GC        | 40(37.74)           | 0.61 (0.36-1.06)   | 0.078 | 0.73 (0.42-1.27)    | 0.261 |
|              |            | CC        | 33(31.13)           | 0.77 (0.44-1.32)   | 0.338 | 0.81 (0.46-1.44)    | 0.476 |
|              |            | GC+CC     | 73(68.87)           | 0.73 (0.46-1.15)   | 0.173 | 0.81 (0.50-1.32)    | 0.398 |
|              |            |           |                     | 107                |       |                     |       |
| <i>ATG5</i>  | rs3804338  | CC        | 84(78.50)           | Reference          |       | Reference           |       |
|              |            | CT        | 20(18.69)           | 1.26 (0.76-2.11)   | 0.375 | 1.25 (0.73-2.14)    | 0.418 |

|              |            |       |           |                  |       |                  |       |
|--------------|------------|-------|-----------|------------------|-------|------------------|-------|
|              |            | TT    | 3(2.80)   | N.C.             | N.C.  | N.C.             | N.C.  |
|              |            | CT+TT | 23(21.50) | 1.02 (0.63-1.67) | 0.931 | 0.97 (0.58-1.65) | 0.918 |
|              |            |       | 104       |                  |       |                  |       |
| <i>ATG7</i>  | rs1375206  | CC    | 36(34.62) | Reference        |       | Reference        |       |
|              |            | CG    | 56(53.85) | 0.80 (0.51-1.25) | 0.321 | 0.35 (0.50-1.27) | 0.799 |
|              |            | GG    | 12(11.54) | 1.39 (0.65-2.95) | 0.397 | 1.60 (0.73-3.50) | 0.74  |
|              |            | CG+GG | 68(65.38) | 0.87 (0.57-1.35) | 0.539 | 0.89 (0.57-1.40) | 0.620 |
|              |            |       | 107       |                  |       |                  |       |
| <i>ATG7</i>  | rs1470612  | GG    | 45(42.06) | Reference        |       | Reference        |       |
|              |            | GA    | 53(49.53) | 0.82 (0.53-1.26) | 0.359 | 0.79 (0.50-1.23) | 0.291 |
|              |            | AA    | 9(8.41)   | 1.05 (0.46-2.39) | 0.902 | 1.23 (0.53-2.83) | 0.630 |
|              |            | GA+AA | 62(57.94) | 0.86 (0.56-1.30) | 0.462 | 0.85 (0.55-1.31) | 0.454 |
|              |            |       | 107       |                  |       |                  |       |
| <i>ATG9B</i> | rs61733329 | CC    | 91(85.05) | Reference        |       | Reference        |       |
|              |            | CT    | 15(14.02) | 1.17 (0.64-2.14) | 0.610 | 1.34 (0.71-2.52) | 0.367 |
|              |            | TT    | 1(0.93)   | N.C.             | N.C.  | N.C.             | N.C.  |
|              |            | CT+TT | 16(14.95) | 1.23 (0.68-2.21) | 0.492 | 1.40 (0.76-2.60) | 0.284 |
|              |            |       | 107       |                  |       |                  |       |
| <i>ATG10</i> | rs10514231 | TT    | 92(85.98) | Reference        |       | Reference        |       |
|              |            | TC    | 13(12.15) | 1.09 (1.14-3.31) | 0.799 | 1.07 (0.54-2.13) | 0.844 |
|              |            | CC    | 2(1.87)   | N.C.             | N.C.  | N.C.             | N.C.  |
|              |            | TC+CC | 15(14.02) | 0.84 (0.45-1.56) | 0.578 | 0.98 (0.51-1.86) | 0.939 |
|              |            |       | 108       |                  |       |                  |       |
| <i>ATG10</i> | rs1864182  | TT    | 91(84.26) | Reference        |       | Reference        |       |
|              |            | TG    | 16(14.81) | 0.75 (0.40-1.40) | 0.361 | 0.79 (0.41-1.55) | 0.495 |
|              |            | GG    | 1(0.93)   | N.C.             | N.C.  | N.C.             | N.C.  |
|              |            | TG+GG | 17(15.74) | 0.82 (0.45-1.50) | 0.515 | 0.87 (0.46-1.66) | 0.675 |
|              |            |       | 106       |                  |       |                  |       |
| <i>ATG10</i> | rs1864183  | AA    | 80(75.47) | Reference        |       | Reference        |       |
|              |            | AG    | 25(23.58) | 0.90 (0.55-1.47) | 0.672 | 0.88 (0.52-1.50) | 0.646 |
|              |            | GG    | 1(0.94)   | N.C.             | N.C.  | N.C.             | N.C.  |
|              |            | AG+GG | 26(24.53) | 0.94 (0.58-1.53) | 0.797 | 0.92 (0.55-1.55) | 0.765 |

|              |            |       |           |                  |       |                  |       |
|--------------|------------|-------|-----------|------------------|-------|------------------|-------|
|              |            |       |           | 106              |       |                  |       |
| <i>ATG10</i> | rs3734114  | TT    | 69(65.09) | Reference        |       | Reference        |       |
|              |            | TC    | 33(31.13) | 0.94 (0.58-1.50) | 0.778 | 1.10 (0.67-1.80) | 0.711 |
|              |            | CC    | 4(3.77)   | N.C.             | N.C.  | N.C.             | N.C.  |
|              |            | TC+CC | 27(34.91) | 0.96 (0.61-1.51) | 0.857 | 1.13 (0.70-1.81) | 0.624 |
|              |            |       |           | 107              |       |                  |       |
| <i>ATG12</i> | rs26532    | AA    | 46(42.99) | Reference        |       | Reference        |       |
|              |            | AC    | 42(39.25) | 1.07 (0.67-1.71) | 0.788 | 1.02 (0.61-1.71) | 0.932 |
|              |            | CC    | 19(17.76) | 1.16 (0.63-2.13) | 0.645 | 1.18 (0.63-2.21) | 0.606 |
|              |            | AC+CC | 61(57.01) | 1.11 (0.72-1.71) | 0.643 | 1.05 (0.66-1.66) | 0.837 |
|              |            |       |           | 103              |       |                  |       |
| <i>ATG12</i> | rs26534    | GG    | 38(36.89) | Reference        |       | Reference        |       |
|              |            | GA    | 50(48.54) | 1.09 (0.68-1.73) | 0.727 | 1.09 (0.68-1.75) | 0.729 |
|              |            | AA    | 15(14.56) | 1.27 (0.64-2.54) | 0.496 | 1.17 (0.59-2.32) | 0.664 |
|              |            | GA+AA | 65(63.11) | 1.03 (0.68-1.58) | 0.876 | 1.03 (0.67-1.58) | 0.911 |
|              |            |       |           | 106              |       |                  |       |
| <i>BECN</i>  | rs11552192 | AA    | 68(64.15) | Reference        |       | Reference        |       |
|              |            | AT    | 34(32.08) | 1.01 (0.65-1.57) | 0.965 | 0.83 (0.52-1.33) | 0.444 |
|              |            | TT    | 4(3.77)   | N.C.             | N.C.  | N.C.             | N.C.  |
|              |            | AT+TT | 38(35.85) | 1.10 (0.72-1.67) | 0.669 | 0.94 (0.61-1.47) | 0.796 |

Note: SNP, single nucleotide polymorphism; PFS, progression-free survival time; OS, overall survival time; HR, hazard ratio; CI, confidence interval; N.C., not calculated.

Hazard ratios (HRs) and 95% confidence intervals (CIs) for the association between SNPs and PFS as well as OS were estimated by Cox regression adjusted by sex, age, smoking status, ECOG and stages.

**Supplementary Table 5. Associations of genetic variants of autophagy core genes with OS and PFS in patients with *EGFR* mutations**

| Genes        | SNPs       | Genotypes | Patients<br>No. (%) | OS of patients with <i>EGFR</i><br>mutation |          | PFS of patients with <i>EGFR</i><br>mutation |              |
|--------------|------------|-----------|---------------------|---------------------------------------------|----------|----------------------------------------------|--------------|
|              |            |           |                     | HR (95% CI)                                 | <i>P</i> | HR (95% CI)                                  | <i>P</i>     |
|              |            |           |                     | 80                                          |          |                                              |              |
| <i>ATG2B</i> | rs3759601  | CC        | 40(50.00)           | Reference                                   |          | Reference                                    |              |
|              |            | CG        | 34(42.50)           | 1.23 (0.75-2.03)                            | 0.413    | 1.12 (0.68-1.85)                             | 0.665        |
|              |            | GG        | 6(7.50)             | 1.25 (0.47-3.30)                            | 0.653    | 1.25 (0.44-4.55)                             | 0.675        |
|              |            | CG+GG     | 40(50.)             | 1.25 (0.77-2.01)                            | 0.369    | 1.13 (0.70-1.83)                             | 0.624        |
|              |            |           |                     | 81                                          |          |                                              |              |
| <i>ATG2B</i> | rs9323945  | CC        | 50(61.73)           | Reference                                   |          | Reference                                    |              |
|              |            | CT        | 27(33.33)           | 1.13 (0.65-1.97)                            | 0.658    | 1.19 (0.69-2.06)                             | 0.526        |
|              |            | TT        | 4(4.94)             | N.C.                                        | N.C.     | N.C.                                         | N.C.         |
|              |            | CT+TT     | 31(38.27)           | 1.07 (0.64-1.77)                            | 0.805    | 1.12 (0.86-1.86)                             | 0.660        |
|              |            |           |                     | 80                                          |          |                                              |              |
| <i>ATG3</i>  | rs7652377  | CC        | 37(46.25)           | Reference                                   |          | Reference                                    |              |
|              |            | CA        | 37(46.25)           | 0.71 (0.42-1.19)                            | 0.189    | 0.73 (0.42-1.25)                             | 0.251        |
|              |            | AA        | 6(7.50)             | 0.48 (0.18-1.29)                            | 0.146    | 0.58 (0.21-1.59)                             | 0.286        |
|              |            | CA+AA     | 43(53.75)           | 0.68 (0.41-1.12)                            | 0.129    | 0.73 (0.43-1.23)                             | 0.230        |
|              |            |           |                     | 78                                          |          |                                              |              |
| <i>ATG4C</i> | rs10493327 | AA        | 42(53.85)           | Reference                                   |          | Reference                                    |              |
|              |            | AG        | 24(30.77)           | 1.24 (0.69-2.24)                            | 0.472    | 1.47 (0.79-2.77)                             | 0.226        |
|              |            | GG        | 12(15.38)           | 0.78 (0.37-1.65)                            | 0.516    | 0.86 (0.40-1.88)                             | 0.710        |
|              |            | AG+GG     | 36(46.15)           | 1.04 (0.61-1.77)                            | 0.882    | 1.20 (0.68-2.12)                             | 0.519        |
|              |            |           |                     | 80                                          |          |                                              |              |
| <i>ATG5</i>  | rs2245214  | GG        | 26(32.50)           | Reference                                   |          | Reference                                    |              |
|              |            | GC        | 29(36.25)           | 0.59 (0.32-1.10)                            | 0.095    | 0.60 (0.32-1.12)                             | 0.110        |
|              |            | CC        | 25(31.25)           | 0.66 (0.35-1.24)                            | 0.196    | 0.59 (0.31-1.13)                             | 0.113        |
|              |            | GC+CC     | 54(67.50)           | 0.62 (0.37-1.03)                            | 0.066    | <b>0.57 (0.34-0.97)</b>                      | <b>0.037</b> |
|              |            |           |                     | 80                                          |          |                                              |              |
| <i>ATG5</i>  | rs3804338  | CC        | 64(80.00)           | Reference                                   |          | Reference                                    |              |



|              |            |       |           |                  |       |                  |       |
|--------------|------------|-------|-----------|------------------|-------|------------------|-------|
|              |            | CT    | 14(17.50) | 1.21 (0.66-2.22) | 0.529 | 1.38 (0.75-2.55) | 0.304 |
|              |            | TT    | 2(2.50)   | N.C.             | N.C.  | N.C.             | N.C.  |
|              |            | CT+TT | 16(20.00) | 0.95 (0.54-1.70) | 0.873 | 1.10 (0.60-2.02) | 0.750 |
|              |            |       | 78        |                  |       |                  |       |
| <i>ATG7</i>  | rs1375206  | CC    | 27(34.62) | Reference        |       | Reference        |       |
|              |            | CG    | 41(52.56) | 0.74 (0.43-1.25) | 0.259 | 0.82 (0.48-1.41) | 0.473 |
|              |            | GG    | 10(12.82) | 1.31 (0.56-3.04) | 0.533 | 1.50 (0.63-3.61) | 0.361 |
|              |            | CG+GG | 51(65.38) | 0.82 (0.50-1.37) | 0.449 | 0.92 (0.55-1.54) | 0.756 |
|              |            |       | 80        |                  |       |                  |       |
| <i>ATG7</i>  | rs1470612  | GG    | 35(43.75) | Reference        |       | Reference        |       |
|              |            | GA    | 38(47.50) | 0.76 (0.45-1.28) | 0.302 | 0.79 (0.47-1.32) | 0.366 |
|              |            | AA    | 7(8.75)   | 0.90 (0.35-2.30) | 0.831 | 1.08 (0.12-2.78) | 0.874 |
|              |            | GA+AA | 45(56.25) | 0.80 (0.49-1.32) | 0.386 | 0.85 (0.52-1.40) | 0.523 |
|              |            |       | 80        |                  |       |                  |       |
| <i>ATG9B</i> | rs61733329 | CC    | 67(83.75) | Reference        |       | Reference        |       |
|              |            | CT    | 12(15.00) | 1.33 (0.68-2.61) | 0.405 | 1.72 (0.87-3.40) | 0.121 |
|              |            | TT    | 1(1.25)   | N.C.             | N.C.  | N.C.             | N.C.  |
|              |            | CT+TT | 13(16.25) | 1.41 (0.73-2.70) | 0.305 | 1.79 (0.92-3.49) | 0.085 |
|              |            |       | 80        |                  |       |                  |       |
| <i>ATG10</i> | rs10514231 | TT    | 70(87.50) | Reference        |       | Reference        |       |
|              |            | TC    | 9(11.25)  | 1.01 (0.46-2.24) | 0.980 | 0.92 (0.41-2.07) | 0.841 |
|              |            | CC    | 1(1.25)   | N.C.             | N.C.  | N.C.             | N.C.  |
|              |            | TC+CC | 10(12.50) | 1.14 (0.54-2.43) | 0.726 | 1.05 (0.49-2.25) | 0.909 |
|              |            |       | 81        |                  |       |                  |       |
| <i>ATG10</i> | rs1864182  | TT    | 70(86.42) | Reference        |       | Reference        |       |
|              |            | TG    | 10(12.35) | 1.13 (0.54-2.40) | 0.742 | 1.03 (0.48-2.20) | 0.949 |
|              |            | GG    | 1(1.23)   | N.C.             | N.C.  | N.C.             | N.C.  |
|              |            | TG+GG | 11(13.58) | 1.26 (0.62-2.58) | 0.526 | 1.14 (0.55-2.36) | 0.720 |
|              |            |       | 79        |                  |       |                  |       |
| <i>ATG10</i> | rs1864183  | AA    | 60(75.79) | Reference        |       | Reference        |       |
|              |            | AG    | 18(22.78) | 1.30 (0.73-2.33) | 0.373 | 1.20 (0.67-2.14) | 0.550 |
|              |            | GG    | 1(1.27)   | N.C.             | N.C.  | N.C.             | N.C.  |

|              |            |       |           |                  |       |                  |       |
|--------------|------------|-------|-----------|------------------|-------|------------------|-------|
|              |            | AG+GG | 19(24.05) | 1.36 (0.77-2.41) | 0.287 | 1.25 (0.71-2.21) | 0.446 |
|              |            | TT    | 54(68.35) | Reference        |       | Reference        |       |
| <i>ATG10</i> | rs3734114  | TC    | 22(27.85) | 0.85 (0.48-1.53) | 0.594 | 0.90 (0.50-1.62) | 0.726 |
|              |            | CC    | 3(3.80)   | N.C.             | N.C.  | N.C.             | N.C.  |
|              |            | TC+CC | 25(31.65) | 0.92 (0.54-1.60) | 0.777 | 0.94 (0.55-1.63) | 0.836 |
|              |            | AA    | 35(43.21) | Reference        |       | Reference        |       |
| <i>ATG12</i> | rs26532    | AC    | 31(38.27) | 1.03 (0.60-1.77) | 0.922 | 1.01 (0.56-1.82) | 0.986 |
|              |            | CC    | 15(18.52) | 1.07 (0.53-2.13) | 0.859 | 1.07 (0.53-2.15) | 0.852 |
|              |            | AC+CC | 46(56.79) | 1.05 (0.64-1.72) | 0.853 | 0.98 (0.59-1.65) | 0.951 |
|              |            | GG    | 28(36.36) | Reference        |       | Reference        |       |
| <i>ATG12</i> | rs26534    | GA    | 38(49.35) | 1.01 (0.59-1.73) | 0.975 | 1.15 (0.67-2.00) | 0.611 |
|              |            | AA    | 11(14.29) | 0.92 (0.39-2.19) | 0.851 | 0.91 (0.40-2.10) | 0.831 |
|              |            | GA+AA | 49(63.64) | 0.95 (0.58-1.55) | 0.823 | 1.02 (0.62-1.68) | 0.942 |
|              |            | AA    | 50(62.50) | Reference        |       | Reference        |       |
| <i>BECN</i>  | rs11552192 | AT    | 28(35.00) | 1.11 (0.66-1.88) | 0.693 | 0.98 (0.57-1.67) | 0.937 |
|              |            | TT    | 2(2.50)   | N.C.             | N.C.  | N.C.             | N.C.  |
|              |            | AT+TT | 30(37.50) | 1.19 (0.71-1.98) | 0.519 | 1.06 (0.63-1.78) | 0.827 |

Note: SNP, single nucleotide polymorphism; PFS, progression-free survival time; OS, overall survival time; HR, hazard ratio; CI, confidence interval; N.C., not calculated.

Hazard ratios (HRs) and 95% confidence intervals (CIs) for the association between SNPs and PFS as well as OS were estimated by Cox regression adjusted by sex, age, smoking status, ECOG and stages.

**Supplementary Table 6. Associations of genetic variants of autophagy core genes with primary resistance and acquired resistance of gefitinib in all patients**

| Genes        | SNPs       | Genotypes | Patients<br>No. (%) | Primary resistance of all patients |              | Acquired resistance of all patients |       |
|--------------|------------|-----------|---------------------|------------------------------------|--------------|-------------------------------------|-------|
|              |            |           |                     | HR (95% CI)                        | P            | HR (95% CI)                         | P     |
| <i>ATG2B</i> | rs3759601  | CC        | 45(42.06)           | Reference                          |              | Reference                           |       |
|              |            | CG        | 8(7.48)             | 1.00 (0.50-2.00)                   | 0.992        | 1.23 (0.69-2.21)                    | 0.486 |
|              |            | GG        | 54(50.47)           | 2.09 (0.60-7.24)                   | 0.245        | 1.88 (0.50-7.03)                    | 0.348 |
|              |            | CG+GG     | 62(57.94)           | 1.37 (0.67-2.76)                   | 0.718        | 1.24 (0.70-2.20)                    | 0.453 |
| <i>ATG2B</i> | rs9323945  | CC        | 65(60.19)           | Reference                          |              | Reference                           |       |
|              |            | CT        | 38(35.19)           | 1.04 (0.52-2.07)                   | 0.923        | 0.55 (0.26-1.15)                    | 0.110 |
|              |            | TT        | 5(4.63)             | N.C.                               | N.C.         | 0.57 (0.19-1.74)                    | 0.321 |
|              |            | CT+TT     | 43(39.81)           | 0.93 (0.46-1.85)                   | 0.825        | 0.61 (0.32-1.17)                    | 0.136 |
| <i>ATG3</i>  | rs7652377  | CC        | 54(50.47)           | Reference                          |              | Reference                           |       |
|              |            | CA        | 46(42.99)           | 1.06 (0.54-2.10)                   | 0.868        | 0.88 (0.48-1.60)                    | 0.676 |
|              |            | AA        | 7(6.54)             | 0.22 (0.03-1.75)                   | 0.151        | 0.97 (0.31-3.06)                    | 0.953 |
|              |            | CA+AA     | 53(49.53)           | 0.87 (0.45-1.68)                   | 0.672        | 0.67 (0.48-1.55)                    | 0.630 |
| <i>ATG4C</i> | rs10493327 | AA        | 53(50.96)           | Reference                          |              | Reference                           |       |
|              |            | AG        | 35(33.65)           | 1.10 (0.46-2.61)                   | 0.830        | 1.70 (0.81-3.57)                    | 0.164 |
|              |            | GG        | 17(16.35)           | 1.62 (0.69-3.79)                   | 0.266        | 0.75 (0.24-2.39)                    | 0.628 |
|              |            | AG+GG     | 52(50.00)           | 1.43 (0.68-2.97)                   | 0.345        | 1.26 (0.65-2.45)                    | 0.493 |
| <i>ATG5</i>  | rs2245214  | GG        | 33(31.13)           | Reference                          |              | Reference                           |       |
|              |            | GC        | 40(37.74)           | 0.53 (0.24-1.19)                   | 0.124        | 0.84 (0.37-1.90)                    | 0.670 |
|              |            | CC        | 33(31.13)           | <b>0.32 (0.13-0.79)</b>            | <b>0.013</b> | 1.46 (0.65-3.30)                    | 0.365 |
|              |            | GC+CC     | 73(68.87)           | <b>0.44 (0.22-0.89)</b>            | <b>0.022</b> | 1.22 (0.61-2.45)                    | 0.583 |
| <i>ATG5</i>  | rs3804338  |           |                     | 107                                |              |                                     |       |

|              |            |       |           |                  |       |                  |       |
|--------------|------------|-------|-----------|------------------|-------|------------------|-------|
|              |            | CC    | 84(78.50) | Reference        |       | Reference        |       |
|              |            | CT    | 20(18.69) | 1.52 (0.66-3.51) | 0.326 | 1.32 (0.64-2.71) | 0.456 |
|              |            | TT    | 3(2.80)   | N.C.             | N.C.  | N.C.             | N.C.  |
|              |            | CT+TT | 23(21.50) | 1.24 (0.55-2.83) | 0.605 | 0.94 (0.47-1.90) | 0.868 |
|              |            |       | 104       |                  |       |                  |       |
| <i>ATG7</i>  | rs1375206  | CC    | 36(34.62) | Reference        |       | Reference        |       |
|              |            | CG    | 56(53.85) | 0.78 (0.36-1.69) | 0.529 | 0.74 (0.40-1.35) | 0.326 |
|              |            | GG    | 12(11.54) | 1.13 (0.37-3.45) | 0.834 | 1.94 (0.61-6.13) | 0.261 |
|              |            | CG+GG | 68(65.38) | 0.84 (0.41-1.75) | 0.647 | 0.83 (0.46-1.49) | 0.534 |
|              |            |       | 107       |                  |       |                  |       |
| <i>ATG7</i>  | rs1470612  | GG    | 45(42.06) | Reference        |       | Reference        |       |
|              |            | GA    | 53(49.53) | 1.01 (0.51-2.03) | 0.968 | 0.65 (0.35-1.18) | 0.156 |
|              |            | AA    | 9(8.41)   | 0.78 (0.21-2.84) | 0.701 | 1.78 (0.59-5.39) | 0.305 |
|              |            | GA+AA | 62(57.94) | 1.00 (0.51-1.97) | 0.991 | 0.73 (0.41-1.30) | 0.284 |
|              |            |       | 108       |                  |       |                  |       |
| <i>ATG7</i>  | rs8154     | TT    | 69(63.89) | Reference        |       | Reference        |       |
|              |            | TC    | 37(34.26) | 0.68 (0.33-1.41) | 0.298 | 0.78 (0.43-1.42) | 0.416 |
|              |            | CC    | 2(1.85)   | N.C.             | N.C.  | N.C.             | N.C.  |
|              |            | TC+CC | 39(36.11) | 0.70 (0.35-1.40) | 0.309 | 0.81 (0.46-1.44) | 0.473 |
|              |            |       | 107       |                  |       |                  |       |
| <i>ATG9B</i> | rs61733329 | CC    | 91(85.05) | Reference        |       | Reference        |       |
|              |            | CT    | 15(14.02) | 1.87 (0.71-4.93) | 0.205 | 0.95 (0.42-2.17) | 0.903 |
|              |            | TT    | 1(0.93)   | N.C.             | N.C.  | N.C.             | N.C.  |
|              |            | CT+TT | 16(14.95) | 2.05 (0.81-5.16) | 0.128 | 0.95 (0.42-2.17) | 0.903 |
|              |            |       | 107       |                  |       |                  |       |
| <i>ATG10</i> | rs10514231 | TT    | 92(85.98) | Reference        |       | Reference        |       |
|              |            | TC    | 13(12.15) | 2.38 (0.98-5.78) | 0.057 | 0.54 (0.17-1.69) | 0.289 |
|              |            | CC    | 2(1.87)   | N.C.             | N.C.  | N.C.             | N.C.  |
|              |            | TC+CC | 15(14.02) | 2.19 (0.96-5.01) | 0.063 | 0.47 (0.15-1.42) | 0.179 |
|              |            |       | 106       |                  |       |                  |       |
| <i>ATG10</i> | rs1864183  | AA    | 80(75.47) | Reference        |       | Reference        |       |
|              |            | AG    | 25(23.58) | 1.34 (0.62-2.90) | 0.465 | 0.74 (0.35-1.59) | 0.440 |

|                |            |       |           |                  |       |                   |       |
|----------------|------------|-------|-----------|------------------|-------|-------------------|-------|
|                |            | GG    | 1(0.94)   | N.C.             | N.C.  | N.C.              | N.C.  |
|                |            | AG+GG | 26(24.53) | 1.44 (0.68-3.04) | 0.343 | 0.74 (0.35-1.59)  | 0.440 |
|                |            |       | 106       |                  |       |                   |       |
| <i>ATG10</i>   | rs3734114  | TT    | 69(65.09) | Reference        |       | Reference         |       |
|                |            | TC    | 33(31.13) | 1.46 (0.71-3.01) | 0.310 | 0.93 (0.47-1.87)  | 0.840 |
|                |            | CC    | 4(3.77)   | N.C.             | N.C.  | N.C.              | N.C.  |
|                |            | TC+CC | 27(34.91) | 1.37 (0.67-2.76) | 0.388 | 1.01 (0.53-1.94)  | 0.970 |
|                |            |       | 107       |                  |       |                   |       |
| <i>ATG12</i>   | rs26532    | AA    | 46(42.99) | Reference        |       | Reference         |       |
|                |            | AC    | 42(39.25) | 1.14 (0.52-2.49) | 0.745 | 0.91 (0.47-1.78)  | 0.789 |
|                |            | CC    | 19(17.76) | 0.82 (0.32-2.14) | 0.689 | 1.79 (0.75-4.32)  | 0.193 |
|                |            | AC+CC | 61(57.01) | 1.09 (0.55-2.15) | 0.808 | 1.22 (0.50-1.68)  | 0.787 |
|                |            |       | 103       |                  |       |                   |       |
| <i>ATG12</i>   | rs26534    | GG    | 38(36.89) | Reference        |       | Reference         |       |
|                |            | GA    | 50(48.54) | 1.25 (0.59-2.65) | 0.560 | 0.98 (0.53-1.82)  | 0.947 |
|                |            | AA    | 15(14.56) | 1.23 (0.49-3.09) | 0.657 | 1.39 (0.47-4.17)  | 0.554 |
|                |            | GA+AA | 65(63.11) | 1.25 (0.64-2.45) | 0.521 | 0.94 (0.53-1.67)  | 0.840 |
|                |            |       | 107       |                  |       |                   |       |
| <i>ATG12</i>   | rs26538    | CC    | 40(37.38) | Reference        |       | Reference         |       |
|                |            | CT    | 54(50.47) | 1.28 (0.61-2.67) | 0.515 | 0.90 (0.49-1.65)  | 0.734 |
|                |            | TT    | 13(12.15) | 1.98 (0.71-5.53) | 0.194 | 3.40 (1.00-11.63) | 0.051 |
|                |            | CT+TT | 67(62.62) | 1.41 (0.72-2.74) | 0.319 | 1.03 (0.58-1.83)  | 0.915 |
|                |            |       | 106       |                  |       |                   |       |
| <i>ATG16L1</i> | rs2241880  | TT    | 44(41.51) | Reference        |       | Reference         |       |
|                |            | TC    | 44(41.51) | 1.17 (0.57-2.39) | 0.670 | 1.62 (0.83-3.17)  | 0.159 |
|                |            | CC    | 18(16.98) | 1.35 (0.48-3.84) | 0.571 | 1.94 (0.82-4.58)  | 0.131 |
|                |            | TC+CC | 62(58.49) | 1.20 (0.62-2.34) | 0.593 | 1.50 (0.84-2.69)  | 0.171 |
|                |            |       | 108       |                  |       |                   |       |
| <i>ATG16L2</i> | rs11235604 | CC    | 89(82.41) | Reference        |       | Reference         |       |
|                |            | CT    | 18(16.67) | 1.37 (0.66-2.86) | 0.401 | 1.81 (0.88-3.70)  | 0.107 |
|                |            | TT    | 1(0.93)   | N.C.             | N.C.  | N.C.              | N.C.  |
|                |            | CT+TT | 19(17.60) | 1.45 (0.72-2.95) | 0.301 | 1.81 (0.88-3.70)  | 0.107 |

|             |            |       |           | 106              |       |                  |       |
|-------------|------------|-------|-----------|------------------|-------|------------------|-------|
| <i>BECN</i> | rs11552192 | AA    | 68(64.15) | Reference        |       | Reference        |       |
|             |            | AT    | 34(32.08) | 1.13 (0.54-2.36) | 0.744 | 0.70 (0.38-1.29) | 0.251 |
|             |            | TT    | 4(3.77)   | N.C.             | N.C.  | N.C.             | N.C.  |
|             |            | AT+TT | 38(35.85) | 1.35 (0.68-2.65) | 0.390 | 0.75 (0.41-1.37) | 0.349 |

Note: SNP, single nucleotide polymorphism; HR, hazard ratio; CI, confidence interval; N.C., not calculated.

Hazard ratios (HRs) and 95% confidence intervals (CIs) for the association between SNPs and gefitinib-resistance were estimated by Cox regression adjusted by sex, age, smoking status, ECOG and stages.

**Supplementary Table 7. Associations of genetic variants of autophagy core genes with primary resistance and acquired resistance of gefitinib in patients with *EGFR* mutations**

| Genes        | SNPs       | Genotypes | Patients with<br><i>EGFR</i><br>mutation<br>No. (%) | Primary resistance of patients with<br><i>EGFR</i> mutation |              | Acquired resistance of patients<br>with <i>EGFR</i> mutation |          |
|--------------|------------|-----------|-----------------------------------------------------|-------------------------------------------------------------|--------------|--------------------------------------------------------------|----------|
|              |            |           |                                                     | HR (95% CI)                                                 | <i>P</i>     | HR (95% CI)                                                  | <i>P</i> |
| <i>ATG2B</i> | rs3759601  | CC        | 40(50.00)                                           | Reference                                                   |              | Reference                                                    |          |
|              |            | CG        | 34(42.50)                                           | 1.41 (0.64-3.12)                                            | 0.393        | 0.96 (0.49-1.85)                                             | 0.891    |
|              |            | GG        | 6(7.50)                                             | 1.11 (0.21-5.76)                                            | 0.900        | 1.79 (0.47-6.80)                                             | 0.395    |
|              |            | CG+GG     | 40(50.)                                             | 1.42 (0.66-3.07)                                            | 0.372        | 0.98 (0.52-1.86)                                             | 0.961    |
| <i>ATG2B</i> | rs9323945  | CC        | 50(61.73)                                           | Reference                                                   |              | Reference                                                    |          |
|              |            | CT        | 27(33.33)                                           | 0.51 (0.70-3.25)                                            | 0.297        | 1.24 (0.55-2.79)                                             | 0.602    |
|              |            | TT        | 4(4.94)                                             | N.C.                                                        | N.C.         | N.C.                                                         | N.C.     |
|              |            | CT+TT     | 31(38.27)                                           | 1.31 (0.61-2.83)                                            | 0.487        | 1.28 (0.65-2.53)                                             | 0.484    |
| <i>ATG3</i>  | rs7652377  | CC        | 37(46.25)                                           | Reference                                                   |              | Reference                                                    |          |
|              |            | CA        | 37(46.25)                                           | 1.07 (0.49-2.33)                                            | 0.868        | 0.60 (0.29-1.25)                                             | 0.174    |
|              |            | AA        | 6(7.50)                                             | 0.29 (0.03-2.69)                                            | 0.279        | 1.17 (0.34-4.00)                                             | 0.803    |
|              |            | CA+AA     | 43(53.75)                                           | 0.90 (0.42-1.92)                                            | 0.777        | 0.68 (0.33-1.39)                                             | 0.285    |
| <i>ATG4C</i> | rs10493327 | AA        | 42(53.85)                                           | Reference                                                   |              | Reference                                                    |          |
|              |            | AG        | 24(30.77)                                           | 1.48 (0.55-3.96)                                            | 0.436        | 1.96 (0.82-4.68)                                             | 0.130    |
|              |            | GG        | 12(15.38)                                           | 1.14 (0.39-3.37)                                            | 0.810        | 0.68 (0.20-2.33)                                             | 0.543    |
|              |            | AG+GG     | 36(46.15)                                           | 1.55 (0.64-3.73)                                            | 0.332        | 1.37 (0.62-3.02)                                             | 0.440    |
| <i>ATG5</i>  | rs2245214  | GG        | 26(32.50)                                           | Reference                                                   |              | Reference                                                    |          |
|              |            | GC        | 29(36.25)                                           | 0.63 (0.26-1.52)                                            | 0.306        | 0.44 (0.17-1.16)                                             | 0.097    |
|              |            | CC        | 25(31.25)                                           | <b>0.22 (0.67-0.70)</b>                                     | <b>0.011</b> | 0.98 (0.40-2.42)                                             | 0.970    |
|              |            | GC+CC     | 54(67.50)                                           | <b>0.43 (0.20-0.94)</b>                                     | <b>0.035</b> | 0.67 (0.32-1.41)                                             | 0.289    |

|              |            |       |           |                  |       |                  |       |
|--------------|------------|-------|-----------|------------------|-------|------------------|-------|
|              |            |       |           | 80               |       |                  |       |
|              |            | CC    | 64(80.00) | Reference        |       | Reference        |       |
| <i>ATG5</i>  | rs3804338  | CT    | 14(17.50) | 1.19 (0.43-3.28) | 0.741 | 1.66 (0.73-3.75) | 0.226 |
|              |            | TT    | 2(2.50)   | N.C.             | N.C.  | N.C.             | N.C.  |
|              |            | CT+TT | 16(20.00) | 0.95 (0.35-2.59) | 0.917 | 1.39 (0.63-3.09) | 0.415 |
|              |            |       |           | 78               |       |                  |       |
|              |            | CC    | 27(34.62) | Reference        |       | Reference        |       |
| <i>ATG7</i>  | rs1375206  | CG    | 41(52.56) | 0.76 (0.30-1.95) | 0.566 | 0.83 (0.42-1.62) | 0.580 |
|              |            | GG    | 10(12.82) | 1.25 (0.37-4.21) | 0.725 | 1.38 (0.34-5.67) | 0.651 |
|              |            | CG+GG | 51(65.38) | 0.88 (0.37-2.12) | 0.778 | 0.93 (0.48-1.80) | 0.836 |
|              |            |       |           | 80               |       |                  |       |
|              |            | GG    | 35(43.75) | Reference        |       | Reference        |       |
| <i>ATG7</i>  | rs1470612  | GA    | 38(47.50) | 1.09 (0.47-2.53) | 0.841 | 0.70 (0.36-1.36) | 0.286 |
|              |            | AA    | 7(8.75)   | 0.97 (0.25-3.76) | 0.969 | 1.23 (0.32-4.75) | 0.768 |
|              |            | GA+AA | 45(56.25) | 1.11 (0.50-2.49) | 0.799 | 0.79 (0.42-1.49) | 0.461 |
|              |            |       |           | 81               |       |                  |       |
|              |            | TT    | 55(67.90) | Reference        |       | Reference        |       |
| <i>ATG7</i>  | rs8154     | TC    | 26(32.50) | 0.53 (0.22-1.28) | 0.159 | 0.75 (0.37-1.53) | 0.429 |
|              |            | CC    | 0(0.00)   | N.C.             | N.C.  | N.C.             | N.C.  |
|              |            | TC+CC | 26(32.50) | 0.53 (0.22-1.28) | 0.159 | 0.75 (0.37-1.53) | 0.429 |
|              |            |       |           | 80               |       |                  |       |
|              |            | CC    | 67(83.75) | Reference        |       | Reference        |       |
| <i>ATG9B</i> | rs61733329 | CT    | 12(15.00) | 2.13 (0.79-5.73) | 0.135 | 1.23 (0.47-3.21) | 0.680 |
|              |            | TT    | 1(1.25)   | N.C.             | N.C.  | N.C.             | N.C.  |
|              |            | CT+TT | 13(16.25) | 2.29 (0.89-5.92) | 0.086 | 1.23 (0.47-3.21) | 0.680 |
|              |            |       |           | 80               |       |                  |       |
|              |            | TT    | 70(87.50) | Reference        |       | Reference        |       |
| <i>ATG10</i> | rs10514231 | TC    | 9(11.25)  | 1.44 (0.46-4.53) | 0.529 | 0.57 (0.17-1.86) | 0.347 |
|              |            | CC    | 1(1.25)   | N.C.             | N.C.  | N.C.             | N.C.  |
|              |            | TC+CC | 10(12.50) | 1.76 (0.63-4.93) | 0.285 | 0.57 (0.17-1.86) | 0.347 |
|              |            |       |           | 79               |       |                  |       |
| <i>ATG10</i> | rs1864183  | AA    | 60(75.79) | Reference        |       | Reference        |       |



|                |            |       |           |                  |       |                   |       |
|----------------|------------|-------|-----------|------------------|-------|-------------------|-------|
|                |            | AG    | 18(22.78) | 1.04 (0.41-2.63) | 0.935 | 1.44 (0.66-3.15)  | 0.360 |
|                |            | GG    | 1(1.27)   | N.C.             | N.C.  | N.C.              | N.C.  |
|                |            | AG+GG | 19(24.05) | 1.61 (0.48-2.78) | 0.739 | 1.44 (0.66-3.15)  | 0.360 |
|                |            |       | 79        |                  |       |                   |       |
| <i>ATG10</i>   | rs3734114  | TT    | 54(68.35) | Reference        |       | Reference         |       |
|                |            | TC    | 22(27.85) | 1.14 (0.49-2.70) | 0.759 | 0.60 (0.26-1.39)  | 0.231 |
|                |            | CC    | 3(3.80)   | N.C.             | N.C.  | N.C.              | N.C.  |
|                |            | TC+CC | 25(31.65) | 1.07 (0.48-2.42) | 0.867 | 0.70 (0.32-1.53)  | 0.370 |
|                |            |       | 81        |                  |       |                   |       |
| <i>ATG12</i>   | rs26532    | AA    | 35(43.21) | Reference        |       | Reference         |       |
|                |            | AC    | 31(38.27) | 1.47 (0.59-3.70) | 0.412 | 0.82 (0.38-1.75)  | 0.605 |
|                |            | CC    | 15(18.52) | 0.80 (0.27-2.33) | 0.679 | 2.21 (0.82-5.97)  | 0.116 |
|                |            | AC+CC | 46(56.79) | 1.17 (0.53-2.54) | 0.701 | 0.93 (0.47-1.84)  | 0.842 |
|                |            |       | 77        |                  |       |                   |       |
| <i>ATG12</i>   | rs26534    | GG    | 28(36.36) | Reference        |       | Reference         |       |
|                |            | GA    | 38(49.35) | 1.64 (0.65-4.11) | 0.292 | 0.92 (0.46-1.84)  | 0.815 |
|                |            | AA    | 11(14.29) | 1.06 (0.36-3.08) | 0.923 | 1.12 (0.25-5.04)  | 0.886 |
|                |            | GA+AA | 49(63.64) | 1.24 (0.57-2.70) | 0.585 | 0.89 (0.46-1.70)  | 0.719 |
|                |            |       | 80        |                  |       |                   |       |
| <i>ATG12</i>   | rs26538    | CC    | 31(38.75) | Reference        |       | Reference         |       |
|                |            | CT    | 40(50.00) | 1.43 (0.59-3.60) | 0.447 | 0.81 (0.42-1.58)  | 0.539 |
|                |            | TT    | 9(11.25)  | 2.43 (0.68-8.63) | 0.170 | 2.45 (0.54-11.00) | 0.243 |
|                |            | CT+TT | 49(61.25) | 1.31 (0.61-2.84) | 0.490 | 0.95 (0.50-1.82)  | 0.885 |
|                |            |       | 80        |                  |       |                   |       |
| <i>ATG16L1</i> | rs2241880  | TT    | 36(45.00) | Reference        |       | Reference         |       |
|                |            | TC    | 31(38.75) | 1.59 (0.71-3.57) | 0.262 | 1.59 (0.73-3.46)  | 0.247 |
|                |            | CC    | 13(16.25) | 1.75 (0.55-5.54) | 0.341 | 1.45 (0.53-3.98)  | 0.470 |
|                |            | TC+CC | 44(55.00) | 1.56 (0.73-3.35) | 0.251 | 1.44 (0.74-2.81)  | 0.285 |
|                |            |       | 81        |                  |       |                   |       |
| <i>ATG16L2</i> | rs11235604 | CC    | 66(81.48) | Reference        |       | Reference         |       |
|                |            | CT    | 14(17.28) | 1.74 (0.67-4.50) | 0.256 | 1.83 (0.76-4.40)  | 0.180 |
|                |            | TT    | 1(1.23)   | N.C.             | N.C.  | N.C.              | N.C.  |

|             |            |       |           |                  |       |                  |       |
|-------------|------------|-------|-----------|------------------|-------|------------------|-------|
|             |            | CT+TT | 15(18.51) | 1.86 (0.75-4.59) | 0.178 | 1.83 (0.76-4.40) | 0.180 |
|             |            | AA    | 50(62.50) | Reference        |       | Reference        |       |
| <i>BECN</i> | rs11552192 | AT    | 28(35.00) | 1.51 (0.67-3.44) | 0.324 | 0.74 (0.36-1.53) | 0.422 |
|             |            | TT    | 2(2.50)   | N.C.             | N.C.  | N.C.             | N.C.  |
|             |            | AT+TT | 30(37.50) | 1.65 (0.74-3.69) | 0.223 | 0.82 (0.41-1.65) | 0.585 |

Note: SNP, single nucleotide polymorphism; HR, hazard ratio; CI, confidence interval; N.C., not calculated.

Hazard ratios (HRs) and 95% confidence intervals (CIs) for the association between SNPs and gefitinib-resistance were estimated by Cox regression adjusted by sex, age, smoking status, ECOG and stages.

Full-length EMSA blots

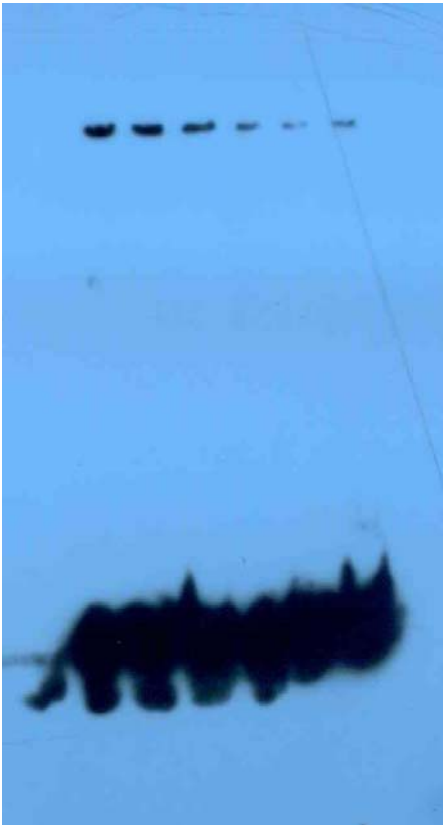

Supplement: 41598_2017_18165_MOESM1_ESM.pdf [file 41598_2017_18165_MOESM1_ESM.pdf]
